# Supplementary material
Source: publisher figshare collection journal article supplement (https://acs.figshare.com/ndownloader/files/5337316)
Supplement: Supplementary file 1 [file 5337316]

  
data_g2mono1 
  
_audit_creation_method            SHELXTL 
_chemical_name_systematic 
; 
 ? 
; 
_chemical_name_common             ? 
_chemical_melting_point           ? 
_chemical_formula_moiety          'C37 H38 Cl4 N4 O Pd2 Si2' 
_chemical_formula_sum 
 'C37 H38 Cl4 N4 O Pd2 Si2' 
_chemical_formula_weight          965.49 
  
loop_ 
 _atom_type_symbol 
 _atom_type_description 
 _atom_type_scat_dispersion_real 
 _atom_type_scat_dispersion_imag 
 _atom_type_scat_source 
 'C'  'C'   0.0033   0.0016 
 'International Tables Vol C Tables 4.2.6.8 and 6.1.1.4' 
 'H'  'H'   0.0000   0.0000 
 'International Tables Vol C Tables 4.2.6.8 and 6.1.1.4' 
 'N'  'N'   0.0061   0.0033 
 'International Tables Vol C Tables 4.2.6.8 and 6.1.1.4' 
 'O'  'O'   0.0106   0.0060 
 'International Tables Vol C Tables 4.2.6.8 and 6.1.1.4' 
 'Si'  'Si'   0.0817   0.0704 
 'International Tables Vol C Tables 4.2.6.8 and 6.1.1.4' 
 'Pd'  'Pd'  -0.9988   1.0072 
 'International Tables Vol C Tables 4.2.6.8 and 6.1.1.4' 
 'Cl'  'Cl'   0.1484   0.1585 
 'International Tables Vol C Tables 4.2.6.8 and 6.1.1.4' 
  
_symmetry_cell_setting            Monoclinic 
_symmetry_space_group_name_H-M    P2(1)/n 
  
loop_ 
 _symmetry_equiv_pos_as_xyz 
 'x, y, z' 
 '-x+1/2, y+1/2, -z+1/2' 
 '-x, -y, -z' 
 'x-1/2, -y-1/2, z-1/2' 
  
_cell_length_a                    13.9305(10) 
_cell_length_b                    13.3510(9) 
_cell_length_c                    22.3537(15) 
_cell_angle_alpha                 90.00 
_cell_angle_beta                  106.618(2) 
_cell_angle_gamma                 90.00 
_cell_volume                      3983.8(5) 
_cell_formula_units_Z             4 
_cell_measurement_temperature     173(2) 
_cell_measurement_reflns_used     3624 
_cell_measurement_theta_min       2.44 
_cell_measurement_theta_max       24.17 
  
_exptl_crystal_description        plate 
_exptl_crystal_colour             yellow 
_exptl_crystal_size_max           0.28 
_exptl_crystal_size_mid           0.19 
_exptl_crystal_size_min           0.10 
_exptl_crystal_density_meas       0 
_exptl_crystal_density_diffrn     1.610 
_exptl_crystal_density_method     'not measured' 
_exptl_crystal_F_000              1936 
_exptl_absorpt_coefficient_mu     1.266 
_exptl_absorpt_correction_type    none 
_exptl_absorpt_correction_T_min   ? 
_exptl_absorpt_correction_T_max   ? 
_exptl_absorpt_process_details    ? 
  
_exptl_special_details 
; 
 ? 
; 
  
_diffrn_ambient_temperature       173(2) 
_diffrn_radiation_wavelength      0.71073 
_diffrn_radiation_type            MoK\a 
_diffrn_radiation_source          'fine-focus sealed tube' 
_diffrn_radiation_monochromator   graphite 
_diffrn_measurement_device_type   'CCD area detector' 
_diffrn_measurement_method        'phi and omega scans' 
_diffrn_detector_area_resol_mean  ? 
_diffrn_standards_number          ? 
_diffrn_standards_interval_count  ? 
_diffrn_standards_interval_time   ? 
_diffrn_standards_decay_%         ? 
_diffrn_reflns_number             29031 
_diffrn_reflns_av_R_equivalents   0.0722 
_diffrn_reflns_av_sigmaI/netI     0.1040 
_diffrn_reflns_limit_h_min        -18 
_diffrn_reflns_limit_h_max        18 
_diffrn_reflns_limit_k_min        -17 
_diffrn_reflns_limit_k_max        17 
_diffrn_reflns_limit_l_min        -29 
_diffrn_reflns_limit_l_max        26 
_diffrn_reflns_theta_min          1.55 
_diffrn_reflns_theta_max          28.30 
_reflns_number_total              9865 
_reflns_number_gt                 5552 
_reflns_threshold_expression      >2sigma(I) 
  
_computing_data_collection        'Bruker SMART' 
_computing_cell_refinement        'Bruker SAINT' 
_computing_data_reduction         'Bruker SAINT' 
_computing_structure_solution     'SHELXS SHELXTL' 
_computing_structure_refinement   'SHELXL SHELXTL' 
_computing_molecular_graphics     'Bruker SHELXTL' 
_computing_publication_material   'Bruker SHELXTL' 
  
_refine_special_details 
; 
 Refinement of F^2^ against ALL reflections.  The weighted R-factor wR and 
 goodness of fit S are based on F^2^, conventional R-factors R are based 
 on F, with F set to zero for negative F^2^. The threshold expression of 
 F^2^ > 2sigma(F^2^) is used only for calculating R-factors(gt) etc. and is 
 not relevant to the choice of reflections for refinement.  R-factors based 
 on F^2^ are statistically about twice as large as those based on F, and R- 
 factors based on ALL data will be even larger. 
; 
  
_refine_ls_structure_factor_coef  Fsqd 
_refine_ls_matrix_type            full 
_refine_ls_weighting_scheme       calc 
_refine_ls_weighting_details 
 'calc w=1/[\s^2^(Fo^2^)+(0.1291P)^2^+0.0000P] where P=(Fo^2^+2Fc^2^)/3' 
_atom_sites_solution_primary      direct 
_atom_sites_solution_secondary    difmap 
_atom_sites_solution_hydrogens    geom 
_refine_ls_hydrogen_treatment     constr 
_refine_ls_extinction_method      none 
_refine_ls_extinction_coef        ? 
_refine_ls_number_reflns          9865 
_refine_ls_number_parameters      455 
_refine_ls_number_restraints      0 
_refine_ls_R_factor_all           0.1314 
_refine_ls_R_factor_gt            0.0701 
_refine_ls_wR_factor_ref          0.2696 
_refine_ls_wR_factor_gt           0.1670 
_refine_ls_goodness_of_fit_ref    1.129 
_refine_ls_restrained_S_all       1.129 
_refine_ls_shift/su_max           0.001 
_refine_ls_shift/su_mean          0.000 
  
loop_ 
 _atom_site_label 
 _atom_site_type_symbol 
 _atom_site_fract_x 
 _atom_site_fract_y 
 _atom_site_fract_z 
 _atom_site_U_iso_or_equiv 
 _atom_site_adp_type 
 _atom_site_occupancy 
 _atom_site_symmetry_multiplicity 
 _atom_site_calc_flag 
 _atom_site_refinement_flags 
 _atom_site_disorder_assembly 
 _atom_site_disorder_group 
Pd1 Pd 1.04456(5) -0.05848(5) 0.93104(3) 0.0313(2) Uani 1 1 d . . . 
Pd2 Pd 1.00682(5) 0.07261(5) 0.68215(3) 0.0346(2) Uani 1 1 d . . . 
Cl1 Cl 0.95648(16) 0.09017(17) 0.91656(10) 0.0389(5) Uani 1 1 d . . . 
Cl2 Cl 1.13319(17) -0.20617(17) 0.94260(11) 0.0417(5) Uani 1 1 d . . . 
Cl3 Cl 0.9612(2) 0.1674(2) 0.59346(12) 0.0589(7) Uani 1 1 d . . . 
Cl4 Cl 1.05513(17) -0.02978(17) 0.76829(10) 0.0407(5) Uani 1 1 d . . . 
Si1 Si 0.67527(19) -0.1077(2) 0.73911(12) 0.0405(6) Uani 1 1 d . . . 
Si2 Si 1.29293(18) 0.26082(19) 0.89209(11) 0.0347(6) Uani 1 1 d . . . 
N1 N 0.9138(4) -0.1365(5) 0.8968(3) 0.0266(14) Uani 1 1 d . . . 
N2 N 0.8787(5) -0.0105(6) 0.6508(3) 0.0322(16) Uani 1 1 d . . . 
N3 N 1.1348(5) 0.1556(5) 0.7167(3) 0.0262(14) Uani 1 1 d . . . 
N4 N 1.1761(4) 0.0196(5) 0.9620(3) 0.0263(14) Uani 1 1 d . . . 
C1 C 0.5688(7) -0.1964(9) 0.7117(5) 0.058(3) Uani 1 1 d . . . 
H1A H 0.5388 -0.2093 0.7456 0.088 Uiso 1 1 calc R . . 
H1B H 0.5931 -0.2595 0.6990 0.088 Uiso 1 1 calc R . . 
H1C H 0.5183 -0.1672 0.6761 0.088 Uiso 1 1 calc R . . 
C2 C 0.6360(7) 0.0190(8) 0.7537(4) 0.044(2) Uani 1 1 d . . . 
C3 C 0.6576(8) 0.0629(8) 0.8124(5) 0.051(3) Uani 1 1 d . . . 
H3 H 0.6964 0.0257 0.8471 0.061 Uiso 1 1 calc R . . 
C4 C 0.6258(9) 0.1574(9) 0.8230(6) 0.068(3) Uani 1 1 d . . . 
H4 H 0.6413 0.1833 0.8642 0.081 Uiso 1 1 calc R . . 
C5 C 0.5714(8) 0.2138(9) 0.7732(7) 0.068(3) Uani 1 1 d . . . 
H5 H 0.5494 0.2791 0.7798 0.081 Uiso 1 1 calc R . . 
C6 C 0.5494(8) 0.1747(10) 0.7143(7) 0.069(4) Uani 1 1 d . . . 
H6 H 0.5127 0.2137 0.6797 0.083 Uiso 1 1 calc R . . 
C7 C 0.5801(8) 0.0789(8) 0.7044(5) 0.055(3) Uani 1 1 d . . . 
H7 H 0.5628 0.0531 0.6630 0.066 Uiso 1 1 calc R . . 
C8 C 0.7625(6) -0.1560(6) 0.8138(4) 0.036(2) Uani 1 1 d . . . 
C9 C 0.8537(6) -0.1072(7) 0.8429(4) 0.039(2) Uani 1 1 d . . . 
H9 H 0.8725 -0.0509 0.8227 0.047 Uiso 1 1 calc R . . 
C10 C 0.8886(6) -0.2118(7) 0.9276(4) 0.039(2) Uani 1 1 d . . . 
H10 H 0.9322 -0.2304 0.9671 0.046 Uiso 1 1 calc R . . 
C11 C 0.8011(7) -0.2635(8) 0.9041(5) 0.051(3) Uani 1 1 d . . . 
H11 H 0.7844 -0.3178 0.9268 0.061 Uiso 1 1 calc R . . 
C12 C 0.7379(7) -0.2361(8) 0.8475(5) 0.047(2) Uani 1 1 d . . . 
H12 H 0.6769 -0.2715 0.8308 0.057 Uiso 1 1 calc R . . 
C13 C 0.7435(7) -0.0909(7) 0.6778(4) 0.042(2) Uani 1 1 d . . . 
C14 C 0.8233(7) -0.0263(7) 0.6891(4) 0.039(2) Uani 1 1 d . . . 
H14 H 0.8400 0.0098 0.7274 0.046 Uiso 1 1 calc R . . 
C15 C 0.8527(7) -0.0577(7) 0.5950(5) 0.045(2) Uani 1 1 d . . . 
H15 H 0.8903 -0.0457 0.5664 0.054 Uiso 1 1 calc R . . 
C16 C 0.7740(8) -0.1220(9) 0.5791(5) 0.057(3) Uani 1 1 d . . . 
H16 H 0.7566 -0.1542 0.5395 0.068 Uiso 1 1 calc R . . 
C17 C 0.7200(7) -0.1403(8) 0.6202(4) 0.050(3) Uani 1 1 d . . . 
H17 H 0.6662 -0.1868 0.6096 0.060 Uiso 1 1 calc R . . 
C18 C 1.4261(7) 0.3039(8) 0.9135(5) 0.050(3) Uani 1 1 d . . . 
H18A H 1.4321 0.3609 0.8872 0.076 Uiso 1 1 calc R . . 
H18B H 1.4689 0.2490 0.9071 0.076 Uiso 1 1 calc R . . 
H18C H 1.4472 0.3243 0.9574 0.076 Uiso 1 1 calc R . . 
C19 C 1.2117(7) 0.3622(7) 0.9084(4) 0.039(2) Uani 1 1 d . . . 
C20 C 1.1345(7) 0.3445(8) 0.9336(4) 0.045(2) Uani 1 1 d . . . 
H20 H 1.1178 0.2773 0.9403 0.054 Uiso 1 1 calc R . . 
C21 C 1.0801(8) 0.4213(8) 0.9494(5) 0.049(3) Uani 1 1 d . . . 
H21 H 1.0277 0.4063 0.9674 0.059 Uiso 1 1 calc R . . 
C22 C 1.1015(8) 0.5203(8) 0.9393(5) 0.053(3) Uani 1 1 d . . . 
H22 H 1.0641 0.5734 0.9499 0.063 Uiso 1 1 calc R . . 
C23 C 1.1770(10) 0.5394(9) 0.9139(7) 0.073(4) Uani 1 1 d . . . 
H23 H 1.1929 0.6066 0.9067 0.088 Uiso 1 1 calc R . . 
C24 C 1.2316(9) 0.4614(9) 0.8984(6) 0.065(4) Uani 1 1 d . . . 
H24 H 1.2839 0.4766 0.8804 0.078 Uiso 1 1 calc R . . 
C25 C 1.2519(6) 0.2283(6) 0.8060(4) 0.0341(19) Uani 1 1 d . . . 
C26 C 1.1634(7) 0.1804(7) 0.7775(4) 0.039(2) Uani 1 1 d . . . 
H26 H 1.1201 0.1640 0.8021 0.047 Uiso 1 1 calc R . . 
C27 C 1.1931(7) 0.1784(7) 0.6814(4) 0.040(2) Uani 1 1 d . . . 
H27 H 1.1724 0.1606 0.6384 0.048 Uiso 1 1 calc R . . 
C28 C 1.2831(7) 0.2273(8) 0.7051(4) 0.045(2) Uani 1 1 d . . . 
H28 H 1.3236 0.2442 0.6789 0.054 Uiso 1 1 calc R . . 
C29 C 1.3134(7) 0.2514(8) 0.7680(5) 0.045(2) Uani 1 1 d . . . 
H29 H 1.3760 0.2837 0.7855 0.055 Uiso 1 1 calc R . . 
C30 C 1.2781(6) 0.1500(6) 0.9407(4) 0.037(2) Uani 1 1 d . . . 
C31 C 1.1928(6) 0.0943(7) 0.9254(4) 0.035(2) Uani 1 1 d . . . 
H31 H 1.1429 0.1084 0.8875 0.042 Uiso 1 1 calc R . . 
C32 C 1.2438(7) -0.0028(7) 1.0143(4) 0.037(2) Uani 1 1 d . . . 
H32 H 1.2316 -0.0563 1.0392 0.044 Uiso 1 1 calc R . . 
C33 C 1.3331(7) 0.0503(8) 1.0340(4) 0.048(3) Uani 1 1 d . . . 
H33 H 1.3817 0.0343 1.0722 0.058 Uiso 1 1 calc R . . 
C34 C 1.3491(7) 0.1267(7) 0.9968(4) 0.041(2) Uani 1 1 d . . . 
H34 H 1.4096 0.1641 1.0094 0.050 Uiso 1 1 calc R . . 
O1 O 0.4467(7) 1.0640(6) 0.8774(5) 0.078(3) Uani 1 1 d . . . 
C35 C 0.4000(8) 0.9893(9) 0.8566(6) 0.061(3) Uani 1 1 d . . . 
C36 C 0.3759(10) 0.9127(9) 0.8988(6) 0.070(3) Uani 1 1 d . . . 
H36A H 0.4009 0.9354 0.9422 0.105 Uiso 1 1 calc R . . 
H36B H 0.4079 0.8490 0.8940 0.105 Uiso 1 1 calc R . . 
H36C H 0.3032 0.9034 0.8879 0.105 Uiso 1 1 calc R . . 
C37 C 0.3646(10) 0.9708(10) 0.7875(6) 0.077(4) Uani 1 1 d . . . 
H37A H 0.2912 0.9722 0.7733 0.115 Uiso 1 1 calc R . . 
H37B H 0.3883 0.9051 0.7782 0.115 Uiso 1 1 calc R . . 
H37C H 0.3912 1.0229 0.7657 0.115 Uiso 1 1 calc R . . 
  
loop_ 
 _atom_site_aniso_label 
 _atom_site_aniso_U_11 
 _atom_site_aniso_U_22 
 _atom_site_aniso_U_33 
 _atom_site_aniso_U_23 
 _atom_site_aniso_U_13 
 _atom_site_aniso_U_12 
Pd1 0.0312(4) 0.0304(4) 0.0288(4) 0.0029(3) 0.0033(3) -0.0027(3) 
Pd2 0.0345(4) 0.0377(4) 0.0299(4) 0.0023(3) 0.0066(3) 0.0001(3) 
Cl1 0.0394(12) 0.0354(12) 0.0382(12) 0.0019(9) 0.0049(9) 0.0034(9) 
Cl2 0.0413(12) 0.0321(12) 0.0465(13) -0.0006(9) 0.0042(10) 0.0064(9) 
Cl3 0.0530(15) 0.0703(19) 0.0455(14) 0.0249(13) 0.0014(11) -0.0050(13) 
Cl4 0.0445(13) 0.0355(12) 0.0346(11) 0.0067(9) -0.0006(9) -0.0057(10) 
Si1 0.0322(13) 0.0444(15) 0.0386(14) 0.0006(12) 0.0001(11) -0.0076(11) 
Si2 0.0335(13) 0.0359(14) 0.0349(13) -0.0013(10) 0.0099(10) -0.0067(10) 
N1 0.020(3) 0.028(4) 0.028(3) -0.002(3) -0.001(3) -0.014(3) 
N2 0.023(3) 0.043(4) 0.028(4) 0.001(3) 0.003(3) -0.014(3) 
N3 0.023(3) 0.031(4) 0.026(3) -0.004(3) 0.008(3) -0.009(3) 
N4 0.017(3) 0.035(4) 0.025(3) -0.001(3) 0.003(3) -0.014(3) 
C1 0.043(6) 0.068(8) 0.054(6) 0.003(6) -0.002(5) -0.012(5) 
C2 0.036(5) 0.055(6) 0.035(5) 0.009(4) 0.004(4) -0.002(4) 
C3 0.047(6) 0.048(6) 0.060(7) 0.009(5) 0.018(5) 0.005(5) 
C4 0.073(8) 0.056(8) 0.074(8) 0.005(6) 0.021(7) 0.012(6) 
C5 0.048(7) 0.049(7) 0.109(11) 0.019(7) 0.027(7) 0.010(5) 
C6 0.040(6) 0.075(9) 0.089(10) 0.041(8) 0.014(6) 0.004(6) 
C7 0.045(6) 0.053(7) 0.063(7) 0.025(5) 0.010(5) 0.021(5) 
C8 0.032(5) 0.030(5) 0.040(5) 0.000(4) 0.000(4) -0.006(4) 
C9 0.034(5) 0.039(5) 0.045(5) 0.006(4) 0.012(4) -0.001(4) 
C10 0.033(5) 0.051(6) 0.028(4) 0.005(4) 0.001(4) -0.010(4) 
C11 0.050(6) 0.048(6) 0.050(6) 0.008(5) 0.006(5) -0.018(5) 
C12 0.044(5) 0.045(6) 0.048(6) 0.001(5) 0.007(4) -0.011(5) 
C13 0.039(5) 0.035(5) 0.045(5) 0.000(4) 0.003(4) -0.003(4) 
C14 0.041(5) 0.037(5) 0.030(4) 0.004(4) -0.002(4) 0.004(4) 
C15 0.044(6) 0.047(6) 0.040(5) 0.002(4) 0.004(4) 0.001(4) 
C16 0.054(7) 0.075(8) 0.037(5) -0.016(5) 0.005(5) 0.004(6) 
C17 0.039(5) 0.068(7) 0.034(5) -0.011(5) -0.002(4) -0.014(5) 
C18 0.038(5) 0.055(7) 0.055(6) -0.004(5) 0.008(5) -0.002(5) 
C19 0.053(6) 0.035(5) 0.024(4) -0.002(4) 0.003(4) -0.009(4) 
C20 0.048(6) 0.046(6) 0.047(6) 0.002(5) 0.024(5) 0.001(5) 
C21 0.049(6) 0.056(7) 0.048(6) 0.008(5) 0.022(5) 0.008(5) 
C22 0.066(7) 0.039(6) 0.055(6) -0.002(5) 0.020(5) 0.008(5) 
C23 0.096(10) 0.040(6) 0.111(11) 0.020(7) 0.073(9) 0.016(6) 
C24 0.076(8) 0.056(7) 0.094(9) -0.009(6) 0.076(8) -0.008(6) 
C25 0.033(5) 0.025(4) 0.044(5) 0.003(4) 0.010(4) -0.003(3) 
C26 0.042(5) 0.038(5) 0.040(5) 0.008(4) 0.016(4) 0.006(4) 
C27 0.049(6) 0.041(5) 0.034(5) 0.004(4) 0.016(4) 0.007(4) 
C28 0.037(5) 0.056(6) 0.044(5) -0.004(5) 0.014(4) -0.010(4) 
C29 0.035(5) 0.052(6) 0.053(6) 0.001(5) 0.017(4) -0.006(4) 
C30 0.037(5) 0.028(5) 0.042(5) -0.003(4) 0.004(4) -0.003(4) 
C31 0.026(4) 0.048(5) 0.029(4) 0.005(4) 0.002(3) -0.009(4) 
C32 0.045(5) 0.039(5) 0.026(4) 0.010(4) 0.010(4) 0.002(4) 
C33 0.037(5) 0.064(7) 0.030(5) 0.005(4) -0.011(4) -0.010(5) 
C34 0.046(5) 0.041(5) 0.032(5) 0.005(4) 0.001(4) -0.013(4) 
O1 0.068(5) 0.057(6) 0.110(8) -0.021(5) 0.024(5) -0.020(4) 
C35 0.042(6) 0.059(8) 0.082(9) -0.011(7) 0.020(6) 0.010(5) 
C36 0.084(9) 0.057(8) 0.080(9) -0.001(7) 0.040(7) 0.008(7) 
C37 0.079(9) 0.060(8) 0.087(10) -0.003(7) 0.016(7) 0.004(7) 
  
_geom_special_details 
; 
 All esds (except the esd in the dihedral angle between two l.s. planes) 
 are estimated using the full covariance matrix.  The cell esds are taken 
 into account individually in the estimation of esds in distances, angles 
 and torsion angles; correlations between esds in cell parameters are only 
 used when they are defined by crystal symmetry.  An approximate (isotropic) 
 treatment of cell esds is used for estimating esds involving l.s. planes. 
; 
  
loop_ 
 _geom_bond_atom_site_label_1 
 _geom_bond_atom_site_label_2 
 _geom_bond_distance 
 _geom_bond_site_symmetry_2 
 _geom_bond_publ_flag 
Pd1 N1 2.047(6) . ? 
Pd1 N4 2.050(6) . ? 
Pd1 Cl2 2.302(2) . ? 
Pd1 Cl1 2.307(2) . ? 
Pd2 N2 2.047(6) . ? 
Pd2 N3 2.052(6) . ? 
Pd2 Cl3 2.284(2) . ? 
Pd2 Cl4 2.300(2) . ? 
Si1 C2 1.836(11) . ? 
Si1 C1 1.860(10) . ? 
Si1 C8 1.876(9) . ? 
Si1 C13 1.891(11) . ? 
Si2 C19 1.866(10) . ? 
Si2 C18 1.869(9) . ? 
Si2 C30 1.882(9) . ? 
Si2 C25 1.896(9) . ? 
N1 C9 1.316(10) . ? 
N1 C10 1.321(11) . ? 
N2 C14 1.325(11) . ? 
N2 C15 1.350(11) . ? 
N3 C27 1.320(11) . ? 
N3 C26 1.344(11) . ? 
N4 C32 1.310(10) . ? 
N4 C31 1.350(10) . ? 
C2 C3 1.388(14) . ? 
C2 C7 1.404(12) . ? 
C3 C4 1.380(15) . ? 
C4 C5 1.376(16) . ? 
C5 C6 1.368(17) . ? 
C6 C7 1.387(16) . ? 
C8 C12 1.406(13) . ? 
C8 C9 1.411(12) . ? 
C10 C11 1.369(12) . ? 
C11 C12 1.368(14) . ? 
C13 C14 1.372(13) . ? 
C13 C17 1.400(13) . ? 
C15 C16 1.357(14) . ? 
C16 C17 1.366(15) . ? 
C19 C20 1.370(13) . ? 
C19 C24 1.383(14) . ? 
C20 C21 1.380(13) . ? 
C21 C22 1.387(14) . ? 
C22 C23 1.355(15) . ? 
C23 C24 1.390(15) . ? 
C25 C26 1.373(12) . ? 
C25 C29 1.402(12) . ? 
C27 C28 1.379(13) . ? 
C28 C29 1.385(13) . ? 
C30 C31 1.359(11) . ? 
C30 C34 1.392(12) . ? 
C32 C33 1.390(12) . ? 
C33 C34 1.375(13) . ? 
O1 C35 1.208(13) . ? 
C35 C36 1.493(17) . ? 
C35 C37 1.502(17) . ? 
  
loop_ 
 _geom_angle_atom_site_label_1 
 _geom_angle_atom_site_label_2 
 _geom_angle_atom_site_label_3 
 _geom_angle 
 _geom_angle_site_symmetry_1 
 _geom_angle_site_symmetry_3 
 _geom_angle_publ_flag 
N1 Pd1 N4 177.8(2) . . ? 
N1 Pd1 Cl2 89.8(2) . . ? 
N4 Pd1 Cl2 89.9(2) . . ? 
N1 Pd1 Cl1 90.3(2) . . ? 
N4 Pd1 Cl1 89.9(2) . . ? 
Cl2 Pd1 Cl1 178.29(9) . . ? 
N2 Pd2 N3 178.0(3) . . ? 
N2 Pd2 Cl3 90.2(2) . . ? 
N3 Pd2 Cl3 91.35(19) . . ? 
N2 Pd2 Cl4 89.0(2) . . ? 
N3 Pd2 Cl4 89.48(19) . . ? 
Cl3 Pd2 Cl4 176.86(11) . . ? 
C2 Si1 C1 113.3(5) . . ? 
C2 Si1 C8 108.0(4) . . ? 
C1 Si1 C8 109.1(4) . . ? 
C2 Si1 C13 104.8(4) . . ? 
C1 Si1 C13 110.8(5) . . ? 
C8 Si1 C13 110.7(4) . . ? 
C19 Si2 C18 109.8(5) . . ? 
C19 Si2 C30 106.5(4) . . ? 
C18 Si2 C30 111.0(4) . . ? 
C19 Si2 C25 110.0(4) . . ? 
C18 Si2 C25 108.6(4) . . ? 
C30 Si2 C25 110.8(4) . . ? 
C9 N1 C10 120.6(7) . . ? 
C9 N1 Pd1 117.1(6) . . ? 
C10 N1 Pd1 122.2(5) . . ? 
C14 N2 C15 118.0(8) . . ? 
C14 N2 Pd2 118.5(6) . . ? 
C15 N2 Pd2 123.2(6) . . ? 
C27 N3 C26 119.5(7) . . ? 
C27 N3 Pd2 121.1(6) . . ? 
C26 N3 Pd2 119.2(6) . . ? 
C32 N4 C31 120.4(7) . . ? 
C32 N4 Pd1 122.0(6) . . ? 
C31 N4 Pd1 117.6(5) . . ? 
C3 C2 C7 115.1(10) . . ? 
C3 C2 Si1 124.1(7) . . ? 
C7 C2 Si1 120.8(8) . . ? 
C4 C3 C2 123.7(11) . . ? 
C5 C4 C3 119.4(12) . . ? 
C6 C5 C4 119.3(12) . . ? 
C5 C6 C7 120.7(11) . . ? 
C6 C7 C2 121.8(12) . . ? 
C12 C8 C9 115.5(8) . . ? 
C12 C8 Si1 122.9(7) . . ? 
C9 C8 Si1 121.3(7) . . ? 
N1 C9 C8 122.6(8) . . ? 
N1 C10 C11 121.7(8) . . ? 
C12 C11 C10 119.1(9) . . ? 
C11 C12 C8 120.5(9) . . ? 
C14 C13 C17 115.4(9) . . ? 
C14 C13 Si1 119.3(7) . . ? 
C17 C13 Si1 125.3(7) . . ? 
N2 C14 C13 124.9(9) . . ? 
N2 C15 C16 121.5(10) . . ? 
C15 C16 C17 119.6(10) . . ? 
C16 C17 C13 120.5(10) . . ? 
C20 C19 C24 116.7(9) . . ? 
C20 C19 Si2 123.1(7) . . ? 
C24 C19 Si2 120.1(7) . . ? 
C19 C20 C21 122.0(10) . . ? 
C20 C21 C22 120.4(10) . . ? 
C23 C22 C21 118.5(10) . . ? 
C22 C23 C24 120.6(11) . . ? 
C19 C24 C23 121.8(9) . . ? 
C26 C25 C29 116.5(8) . . ? 
C26 C25 Si2 123.2(7) . . ? 
C29 C25 Si2 120.3(7) . . ? 
N3 C26 C25 123.4(8) . . ? 
N3 C27 C28 121.8(8) . . ? 
C27 C28 C29 118.7(9) . . ? 
C28 C29 C25 120.1(9) . . ? 
C31 C30 C34 116.7(8) . . ? 
C31 C30 Si2 121.2(7) . . ? 
C34 C30 Si2 121.9(7) . . ? 
N4 C31 C30 122.7(8) . . ? 
N4 C32 C33 121.0(8) . . ? 
C34 C33 C32 118.2(8) . . ? 
C33 C34 C30 120.9(8) . . ? 
O1 C35 C36 121.0(12) . . ? 
O1 C35 C37 121.0(13) . . ? 
C36 C35 C37 118.0(11) . . ? 
  
_diffrn_measured_fraction_theta_max    0.995 
_diffrn_reflns_theta_full              28.30 
_diffrn_measured_fraction_theta_full   0.995 
_refine_diff_density_max    1.817 
_refine_diff_density_min   -2.810 
_refine_diff_density_rms    0.238 
